# Supplementary material for: Dietary Carbohydrate Intake, Dietary Glycemic Load and Outcomes of In Vitro Fertilization: Findings from an Observational Italian Cohort Study
Source: PubMed Central journal article supplement (PMC7352402; doi:10.3390/nu12061568), 2020-05-28

**Table S1.** Relation between GL, Carbohydrate Intake, GI and the number of high-quality oocytes and embryos in strata of vegetable intake.

|                                  | Vegetable Intake < 13 servings/week |     |     |                            |     |     | Vegetable intake ≥ 13 servings/week |     |      |                            |     |     |
|----------------------------------|-------------------------------------|-----|-----|----------------------------|-----|-----|-------------------------------------|-----|------|----------------------------|-----|-----|
|                                  | N. of good-quality oocytes          |     |     | N. of good-quality embryos |     |     | N. of good-quality oocytes          |     |      | N. of good-quality embryos |     |     |
|                                  | Median                              | Q1  | Q3  | Median                     | Q1  | Q3  | Median                              | Q1  | Q3   | Median                     | Q1  | Q3  |
| <b>Glycemic Load</b>             |                                     |     |     |                            |     |     |                                     |     |      |                            |     |     |
| 1 <sup>st</sup> Quartile         | 5.0                                 | 2.0 | 7.0 | 1.0                        | 0.0 | 3.0 | 5.0                                 | 3.0 | 8.0  | 1.0                        | 0.0 | 2.0 |
| 2 <sup>nd</sup> Quartile         | 5.0                                 | 3.0 | 8.0 | 2.0                        | 1.0 | 4.0 | 6.0                                 | 3.0 | 9.0  | 1.0                        | 1.0 | 3.0 |
| 3 <sup>rd</sup> Quartile         | 4.0                                 | 3.0 | 7.0 | 2.0                        | 0.0 | 3.0 | 5.0                                 | 3.0 | 8.0  | 2.0                        | 1.0 | 4.0 |
| 4 <sup>th</sup> Quartile         | 4.0                                 | 2.0 | 6.0 | 1.0                        | 0.0 | 3.0 | 5.0                                 | 2.0 | 7.0  | 1.0                        | 0.0 | 3.0 |
| <b>Carbohydrate Intake (g/d)</b> |                                     |     |     |                            |     |     |                                     |     |      |                            |     |     |
| 1 <sup>st</sup> Quartile         | 5.0                                 | 2.0 | 7.0 | 1.0                        | 0.0 | 3.0 | 5.0                                 | 3.0 | 9.0  | 1.0                        | 0.0 | 2.0 |
| 2 <sup>nd</sup> Quartile         | 5.0                                 | 3.0 | 7.0 | 1.0                        | 0.0 | 3.0 | 6.0                                 | 3.0 | 10.0 | 2.0                        | 1.0 | 4.0 |
| 3 <sup>rd</sup> Quartile         | 4.0                                 | 3.0 | 7.0 | 2.0                        | 1.0 | 4.0 | 5.0                                 | 3.0 | 7.0  | 2.0                        | 1.0 | 4.0 |
| 4 <sup>th</sup> Quartile         | 4.0                                 | 2.0 | 7.0 | 1.5                        | 0.5 | 3.0 | 5.0                                 | 2.0 | 8.0  | 1.0                        | 0.0 | 3.0 |
| <b>Glycemic Index</b>            |                                     |     |     |                            |     |     |                                     |     |      |                            |     |     |
| 1 <sup>st</sup> Quartile         | 6.0                                 | 4.0 | 8.0 | 2.0                        | 1.0 | 4.0 | 5.0                                 | 3.0 | 8.0  | 1.0                        | 0.0 | 3.0 |
| 2 <sup>nd</sup> Quartile         | 4.0                                 | 3.0 | 7.0 | 1.0                        | 0.0 | 3.0 | 6.0                                 | 3.0 | 7.0  | 2.0                        | 1.0 | 4.0 |
| 3 <sup>rd</sup> Quartile         | 4.0                                 | 2.0 | 6.5 | 1.5                        | 1.0 | 3.0 | 5.0                                 | 2.0 | 9.0  | 1.0                        | 0.0 | 2.0 |
| 4 <sup>th</sup> Quartile         | 4.5                                 | 2.0 | 7.5 | 2.0                        | 0.0 | 3.0 | 5.0                                 | 2.0 | 9.0  | 2.0                        | 1.0 | 4.0 |

Q: Quartile.

**Table S2.** Relation between GL, Carbohydrate Intake, GI and the number of high-quality oocytes and embryos in strata of BMI.

|                                  | BMI < 25 (Kg/m <sup>2</sup> ) |     |     |                            |     |     | BMI ≥ 25 (Kg/m <sup>2</sup> ) |     |      |                            |     |     |
|----------------------------------|-------------------------------|-----|-----|----------------------------|-----|-----|-------------------------------|-----|------|----------------------------|-----|-----|
|                                  | N. of good-quality oocytes    |     |     | N. of good-quality embryos |     |     | N. of good-quality oocytes    |     |      | N. of good-quality embryos |     |     |
|                                  | Median                        | Q1  | Q3  | Median                     | Q1  | Q3  | Median                        | Q1  | Q3   | Median                     | Q1  | Q3  |
| <b>Glycemic Load</b>             |                               |     |     |                            |     |     |                               |     |      |                            |     |     |
| 1 <sup>st</sup> Quartile         | 5.0                           | 3.0 | 8.0 | 1.0                        | 0.0 | 3.0 | 4.0                           | 2.0 | 7.0  | 1.0                        | 0.0 | 3.0 |
| 2 <sup>nd</sup> Quartile         | 5.0                           | 3.0 | 9.0 | 2.0                        | 1.0 | 4.0 | 5.0                           | 3.0 | 10.0 | 1.0                        | 1.0 | 3.0 |
| 3 <sup>rd</sup> Quartile         | 5.0                           | 3.0 | 7.0 | 2.0                        | 0.0 | 3.0 | 4.0                           | 3.0 | 7.0  | 2.0                        | 2.0 | 4.0 |
| 4 <sup>th</sup> Quartile         | 4.0                           | 2.0 | 7.0 | 1.0                        | 0.0 | 3.0 | 5.0                           | 2.0 | 9.0  | 1.0                        | 0.0 | 3.0 |
| <b>Carbohydrate Intake (g/d)</b> |                               |     |     |                            |     |     |                               |     |      |                            |     |     |
| 1 <sup>st</sup> Quartile         | 5.0                           | 3.0 | 8.0 | 1.0                        | 0.0 | 3.0 | 4.0                           | 2.0 | 7.0  | 1.0                        | 0.0 | 3.0 |
| 2 <sup>nd</sup> Quartile         | 5.0                           | 3.0 | 9.0 | 2.0                        | 1.0 | 4.0 | 4.5                           | 3.0 | 10.5 | 1.5                        | 0.5 | 4.5 |
| 3 <sup>rd</sup> Quartile         | 4.0                           | 3.0 | 7.0 | 2.0                        | 0.0 | 3.0 | 4.0                           | 3.0 | 7.0  | 2.0                        | 1.0 | 4.0 |
| 4 <sup>th</sup> Quartile         | 4.0                           | 2.0 | 7.0 | 1.5                        | 0.0 | 3.0 | 5.0                           | 2.0 | 9.0  | 1.0                        | 1.0 | 3.0 |
| <b>Glycemic Index</b>            |                               |     |     |                            |     |     |                               |     |      |                            |     |     |
| 1 <sup>st</sup> Quartile         | 6.0                           | 3.0 | 8.0 | 2.0                        | 1.0 | 3.0 | 3.5                           | 2.0 | 7.5  | 1.0                        | 0.0 | 2.5 |
| 2 <sup>nd</sup> Quartile         | 4.0                           | 3.0 | 7.0 | 1.0                        | 0.0 | 3.0 | 6.0                           | 4.0 | 9.0  | 2.0                        | 0.0 | 4.0 |
| 3 <sup>rd</sup> Quartile         | 4.0                           | 2.0 | 7.0 | 1.0                        | 1.0 | 3.0 | 3.5                           | 2.0 | 7.5  | 1.0                        | 0.0 | 3.0 |
| 4 <sup>th</sup> Quartile         | 5.0                           | 2.0 | 8.0 | 2.0                        | 0.0 | 3.0 | 4.5                           | 3.0 | 7.5  | 2.0                        | 1.0 | 3.0 |

Q: Quartile.

Figure S1. Flow Chart. FFQ: Food Frequency Questionnaire; ET: Embryo Transfer

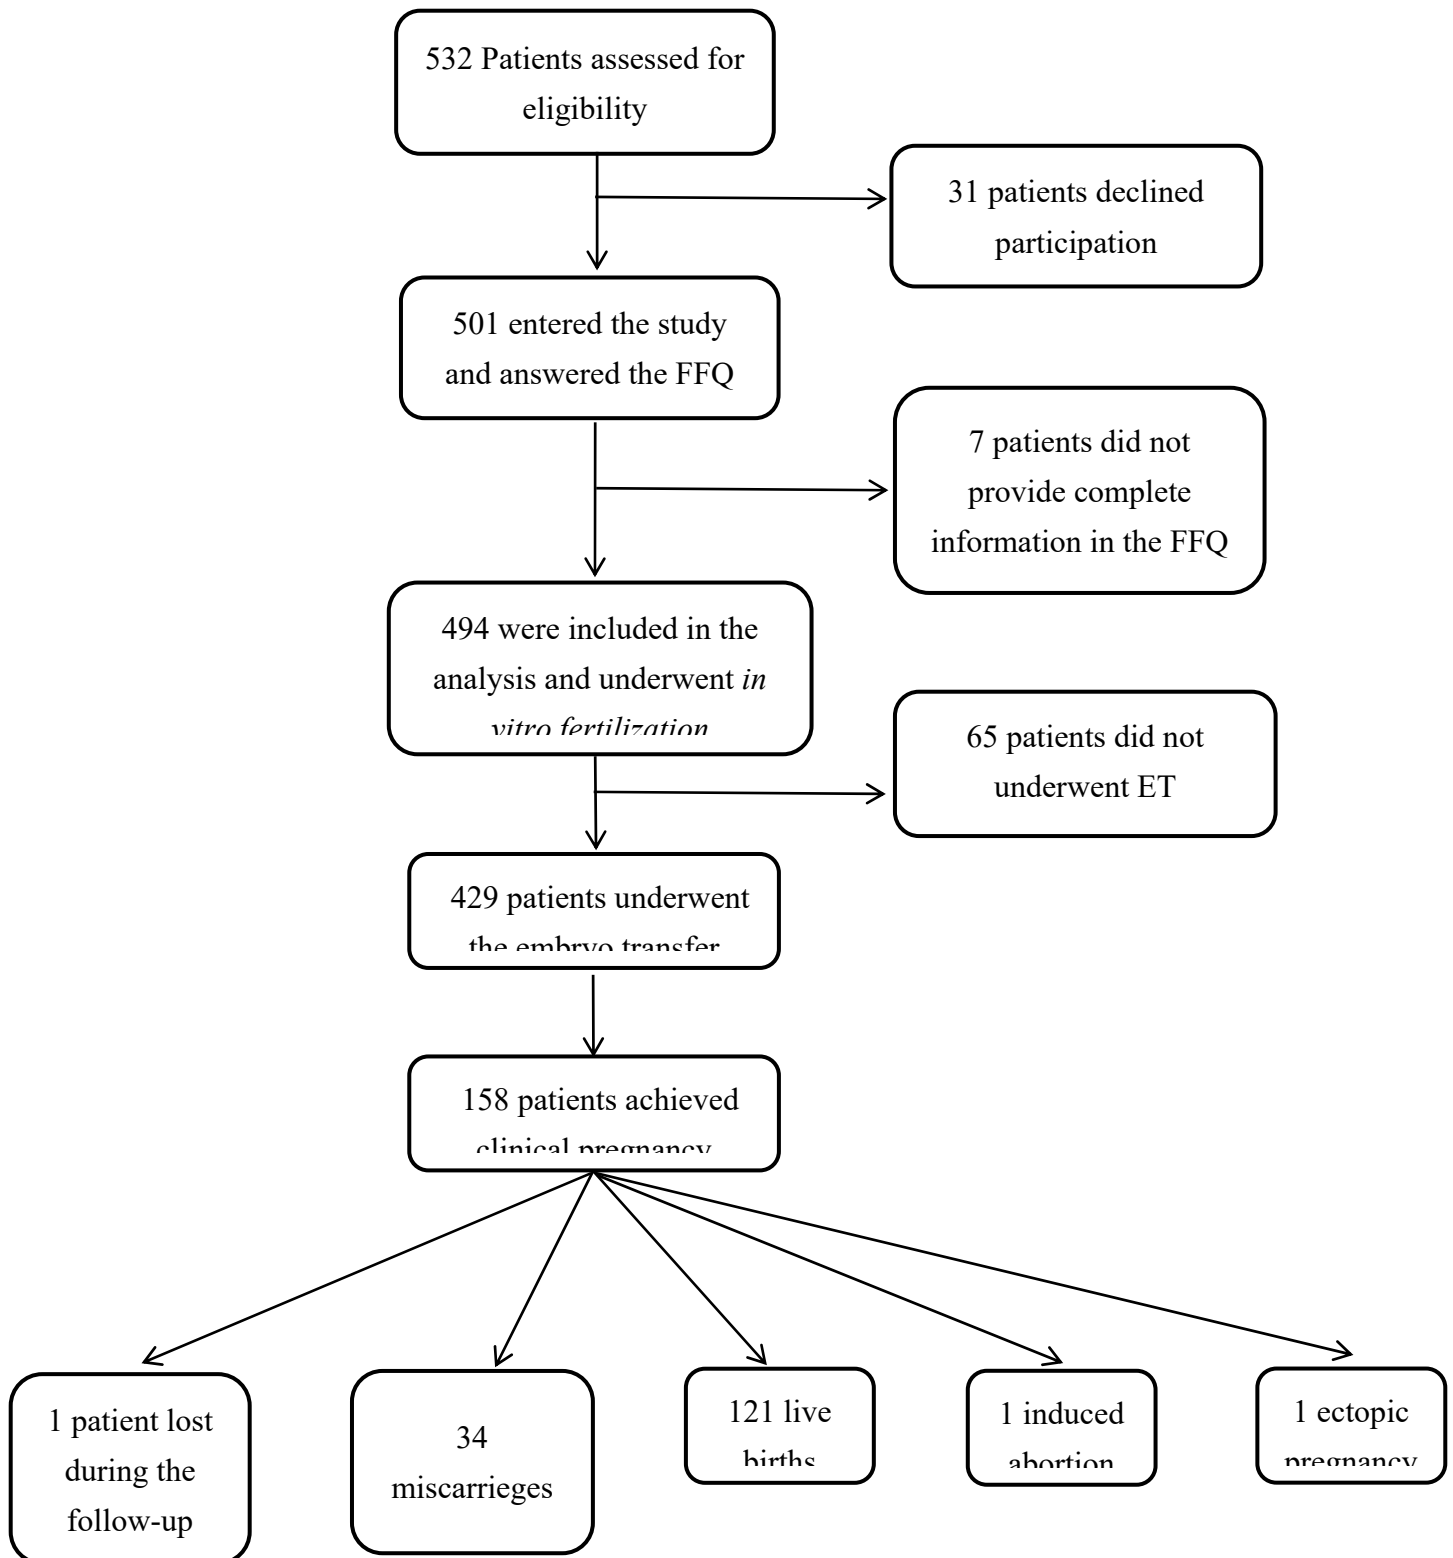

Supplement: nutrients-12-01568-s001.pdf [file nutrients-12-01568-s001.pdf]
